# Supplementary material for: Faecalibacterium prausnitzii Supplementation Prevents Intestinal Barrier Injury and Gut Microflora Dysbiosis Induced by Sleep Deprivation
Source: MDPI journal article supplement (doi:10.3390/nu16081100), 2024-04-09
Supplement: s1 [file s1]

## Supplementary Material

### Supplemental Table

**Table S1 Primers for Real-time PCR**

| Gene name                      | Primer sequence                                           | Produce size | Accession      |
|--------------------------------|-----------------------------------------------------------|--------------|----------------|
| <i>F4/80</i>                   | F: GCTGTGAGATTGTGGAAGCA<br>R: CTGTACCCACATGGCTGATG        | 135          | NM_001424712.1 |
| <i>Tnf-<math>\alpha</math></i> | F: CCCACACCGTCAGCCGATTT<br>R:GTCTAAGTACTTGGGCAGATTGACC    | 200          | NM_001278601.1 |
| <i>Il-6</i>                    | F: TAGTCCTTCCTACCCCAATTTC<br>R: TTGGTCCTTAGCCACTCCTTC     | 76           | NM_031168.2    |
| <i>Il-1<math>\beta</math></i>  | F: GAAATGCCACCTTTTGACAGTG<br>R: TGGATGCTCTCATCAGGACAG     | 116          | NM_008361.4    |
| <i>Il-10</i>                   | F: GCTCTTACTGACTGGCATGAG<br>R: CGCAGCTCTAGGAGCATGTG       | 105          | NM_010548.2    |
| <i>Mcp-1</i>                   | F: CAGGTCCCTGTCATGCTTCT<br>R: TCTGGACCCATTCCCTTCTTG       | 250          | NM_011333.3    |
| <i>Claudin 1</i>               | F: GGGGACAACATCGTGACCG<br>R: AGGAGTCGAAGACTTTGCACT        | 100          | NM_016674.4    |
| <i>Claudin 3</i>               | F: ACCAACTGCGTACAAGACGAG<br>R: CAGAGCCGCCAACAGGAAA        | 78           | NM_009902.4    |
| <i>Zo-1</i>                    | F: AAGAATATGGTCTTCGATTGGC<br>R:ATTTTCTGTACAGTACCATTATCTTC | 131          | NM_009386.3    |
| <i>Occludin</i>                | F: CAGCCTCGGTACAGCAGCAAT<br>R: ATAGTGGTCAGGGTCCGTCCTC     | 102          | NM_001360538.1 |
| <i>Muc2</i>                    | F: TGCTGCTGACGAGTGGTTGGTG<br>R: CGGACGCTTGGTGGTGAGGC      | 76           | NM_023566.4    |
| <i>Bax</i>                     | F: TGAAGACAGGGGCCTTTTGT<br>R: AATTCGCCGGAGACACTCG         | 140          | NM_007527.4    |
| <i>Bcl-2</i>                   | F: ATGCCTTTGTGGAAGTATATGGC<br>R: GGTATGCACCCAGAGTGATGC    | 120          | NM_009741.5    |
| <i>Gapdh</i>                   | F: CCGAGAATGGGAAGCTTGTC<br>R: TTCTCGTGGTTCACACCCATC       | 232          | NM_001411843.1 |
